# Supplementary material
Source: ML conference proceedings conference paper supplement (https://openaccess.thecvf.com/content/ICCV2025/html/Kuo_Efficient_Concertormer_for_ICCV_2025_paper.html)
Supplement: Supplementary file 1 [file Kuo_Efficient_Concertormer_for_ICCV_2025_supplemental.pdf]

# Efficient Concertormer for Image Deblurring and Beyond

## Supplementary Material

In this supplemental material, we first provide real noisy image denoising results and discuss limitations. Then we report training details of tasks other than single-image motion deblurring. Finally, we provide more visual comparisons.

### 8. Evaluations on Real Noisy Image Denoising

We further evaluate our method on the real noisy image denoising on the SIDD dataset. Table 8 shows that the proposed methods, i.e., *Concertormer* and *Concertormer*<sup>†2</sup>, achieve comparable performance against state-of-the-art ones.

### 9. Limitation Analysis

We have demonstrated the efficiency of *Concertormer* in the main paper. Although we propose a building block that can be applied to existing restoration models to solve various image restoration tasks, the backbone restoration model still requires a careful design for better performance improvement when using the proposed *Concertormer*. For example, the improvement of the proposed method on image denoising is marginal as shown in Table 8.

Table 8. Real noisy image denoising. \* denotes methods using additional training data. *Concertormer*<sup>†</sup> has more blocks in the latent layer.

| Dataset     | Metrics      | DnCNN<br>[91]  | BM3D<br>[15]   | CBDNet*<br>[23] | RIDNet*<br>[3] | AINDNet*<br>[30] | VDN<br>[82]    | SADNet*<br>[7] | DANet+*<br>[83] | CycleISP*<br>[84] | MIRNet<br>[85] | DeamNet*<br>[56] | MPRNet<br>[86] | DAGL<br>[49]   | Uformer<br>[71] | Restormer<br>[87] | NAFNet<br>[12] | <i>Concertormer</i> | <i>Concertormer</i> <sup>†</sup> |
|-------------|--------------|----------------|----------------|-----------------|----------------|------------------|----------------|----------------|-----------------|-------------------|----------------|------------------|----------------|----------------|-----------------|-------------------|----------------|---------------------|----------------------------------|
| SIDD<br>[1] | PSNR<br>SSIM | 23.66<br>0.583 | 25.65<br>0.685 | 30.78<br>0.801  | 38.71<br>0.951 | 38.95<br>0.952   | 39.28<br>0.956 | 39.46<br>0.957 | 39.47<br>0.957  | 39.52<br>0.957    | 39.72<br>0.959 | 39.35<br>0.955   | 39.71<br>0.958 | 38.94<br>0.953 | 39.77<br>0.959  | 40.02<br>0.960    | 40.30<br>0.962 | 40.28<br>0.962      | 40.33<br>0.962                   |

### 10. Evaluations on Single-Image Super-Resolution

Although we do not design a dedicated model for super-resolution, our method yields competitive results compared to the state-of-the-art works. We replace the W-MSA and SW-MSA modules in the SwinIR with Concerto SA (Fig. 3) for Table 9.

Table 9. Single-image super-resolution.

| Method      | scale | SET5  |       | SET14 |       | B100  |       | URBAN100 |       | MANGA109 |       | Avg.  |       |
|-------------|-------|-------|-------|-------|-------|-------|-------|----------|-------|----------|-------|-------|-------|
|             |       | PSNR  | SSIM  | PSNR  | SSIM  | PSNR  | SSIM  | PSNR     | SSIM  | PSNR     | SSIM  | PSNR  | SSIM  |
| EDSR [39]   | ×2    | 38.11 | 0.960 | 33.92 | 0.920 | 32.32 | 0.901 | 32.93    | 0.935 | 39.10    | 0.977 | 35.28 | 0.939 |
| NLSN [48]   |       | 38.34 | 0.962 | 34.08 | 0.923 | 32.43 | 0.903 | 33.42    | 0.939 | 39.59    | 0.979 | 35.57 | 0.941 |
| ENLCN [73]  |       | 38.37 | 0.962 | 34.17 | 0.923 | 32.49 | 0.903 | 33.56    | 0.940 | 39.64    | 0.979 | 35.65 | 0.941 |
| SwinIR [38] |       | 38.35 | 0.962 | 34.14 | 0.923 | 32.44 | 0.903 | 33.40    | 0.939 | 39.60    | 0.979 | 35.59 | 0.941 |
| CSA         |       | 38.33 | 0.962 | 34.29 | 0.924 | 32.45 | 0.903 | 33.43    | 0.940 | 39.65    | 0.979 | 35.63 | 0.942 |
| EDSR [39]   | ×4    | 32.46 | 0.897 | 28.80 | 0.788 | 27.71 | 0.742 | 26.64    | 0.803 | 31.02    | 0.915 | 29.33 | 0.829 |
| NLSN [48]   |       | 32.59 | 0.900 | 28.87 | 0.789 | 27.78 | 0.744 | 26.96    | 0.811 | 31.27    | 0.918 | 29.49 | 0.832 |
| ENLCN [73]  |       | 32.67 | 0.900 | 28.94 | 0.789 | 27.82 | 0.745 | 27.12    | 0.814 | 31.33    | 0.919 | 29.58 | 0.833 |
| SwinIR [38] |       | 32.72 | 0.902 | 28.94 | 0.791 | 27.83 | 0.746 | 27.07    | 0.816 | 31.67    | 0.923 | 29.65 | 0.836 |
| CSA         |       | 32.74 | 0.902 | 28.96 | 0.791 | 27.82 | 0.746 | 26.92    | 0.811 | 31.49    | 0.922 | 29.59 | 0.834 |

### 11. Running Time Analysis

In this section, we compare the deblurring methods of self-attention on HIDE [61]. As shown in Table 10, our methods generate the highest scores with relatively short running times. This table demonstrates the efficiency of our Concerto self-attention. The running times are calculated on one RTX 4080 Super GPU with one  $256 \times 256 \times 3$  random input image.

<sup>2</sup>The architecture of *Concertormer* is detailed in Section 4.3, while for *Concertormer*<sup>†</sup>, the configuration of  $L_1 - L_7$  is [2, 4, 8, 16, 8, 4, 4].

Table 10. Running time analysis. We compare our model to self-attention-based deblurring methods. The HIDE [61] dataset is used for metrics. \* denotes the model without Test-time Local Converter.

|           | Uformer [71] | Stripformer[67] | Restormer[87] | Restormer-local[14] | GRL[37] | FFTformer[32] | Concertormer-lite* | Concertormer* |
|-----------|--------------|-----------------|---------------|---------------------|---------|---------------|--------------------|---------------|
| PSNR      | 30.90        | 31.03           | 31.22         | 31.49               | 31.65   | 31.62         | 31.67              | 31.96         |
| SSIM      | 0.953        | 0.940           | 0.942         | 0.945               | 0.947   | 0.946         | 0.947              | 0.950         |
| FLOPs (G) | 90.16        | 177.43          | 140           | 155.13              | 1,289   | 139.09        | 116.79             | 220.2         |
| Param (M) | 50.8         | 19.7            | 26.1          | 26.1                | 20.2    | 16.6          | 28.9               | 50.5          |
| Time (ms) | 22.47        | 25.67           | 57.60         | 183.28              | 344.60  | 103.26        | 45.03              | 83.46         |

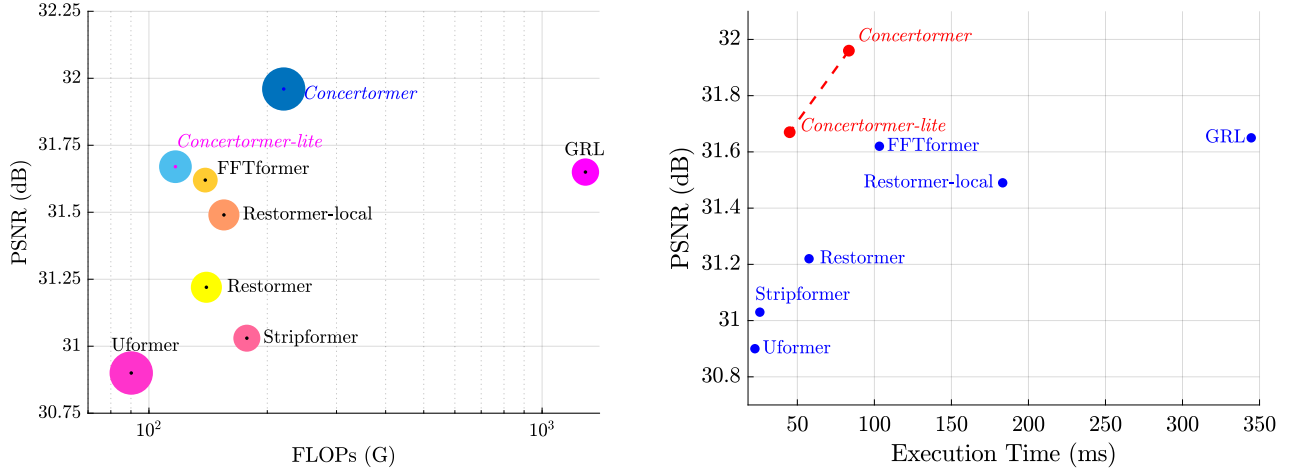

Figure 9. Visualization of model size and execution time.

## 12. Other Training Details

For real noisy image denoising on the SIDD dataset, we train the model for 400,000 iterations, following [12], as additional iterations do not yield further improvements. Since both the training and testing data consist of  $256 \times 256$  pixel images, we do not employ progressive training; instead, we train the model exclusively on  $256 \times 256$  patches.

For the deraining task, however, we adopt a progressive training strategy. The model is trained with  $192 \times 192$  patches for 100,000 iterations, followed by  $256 \times 256$  patches for 200,000 iterations,  $320 \times 320$  patches for 100,000 iterations, and an additional 10,000 iterations using  $128 \times 128$  patches.

As for REDS, we train the model as described in Section 5.1 with the configuration as Section 4.3.

## 13. More Visual Comparisons



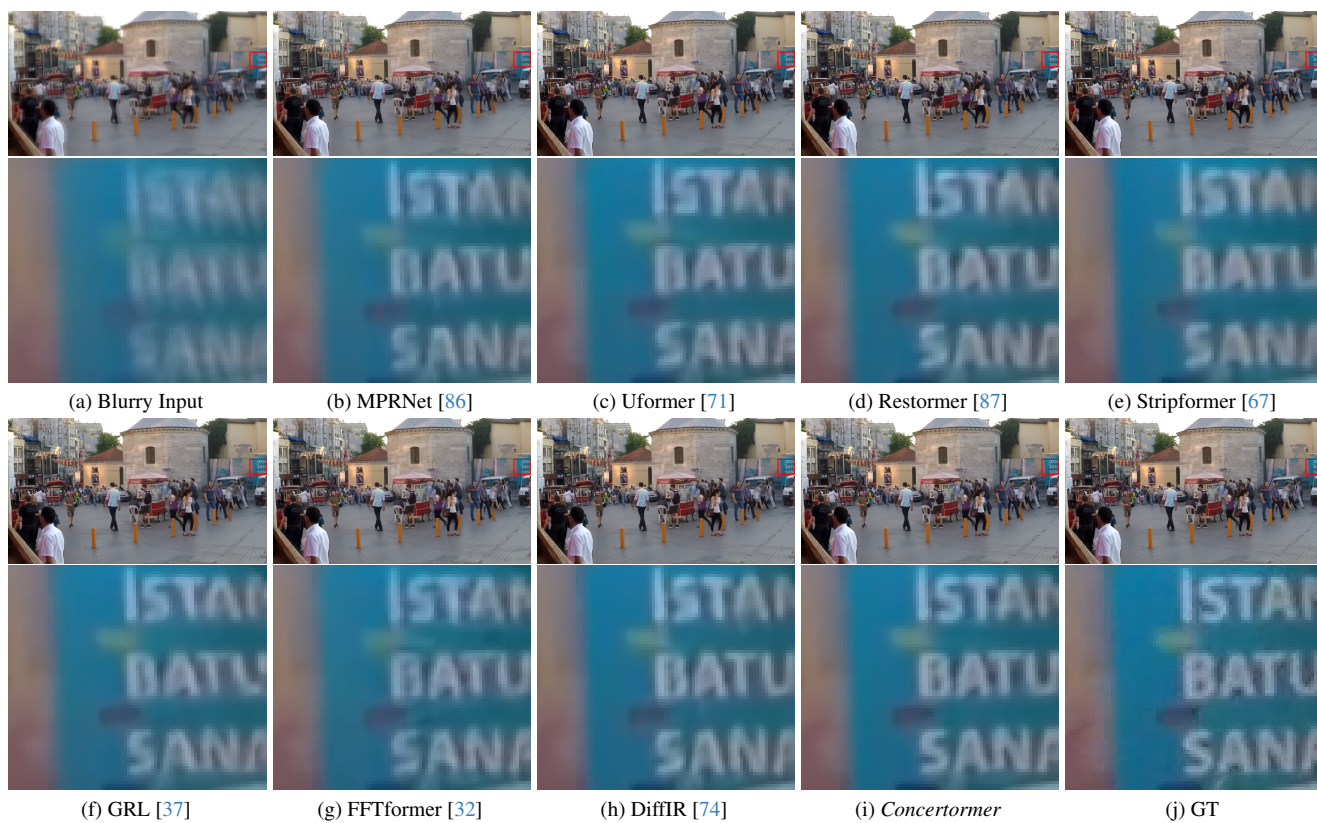

Figure 10. Visual comparisons of single-image motion deblurring on GoPro [50].

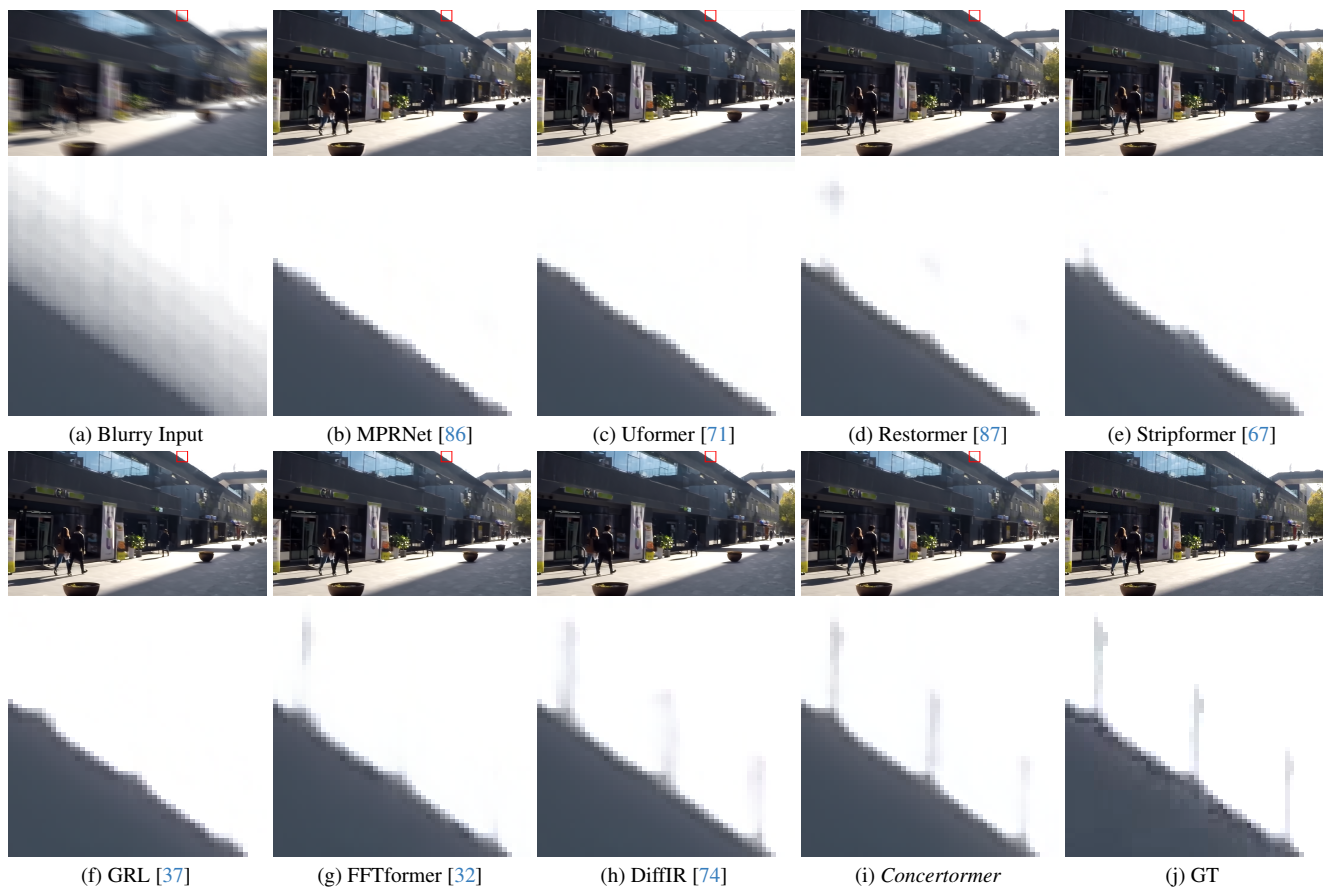

Figure 11. Visual comparisons of single-image motion deblurring on GOPRO [50].

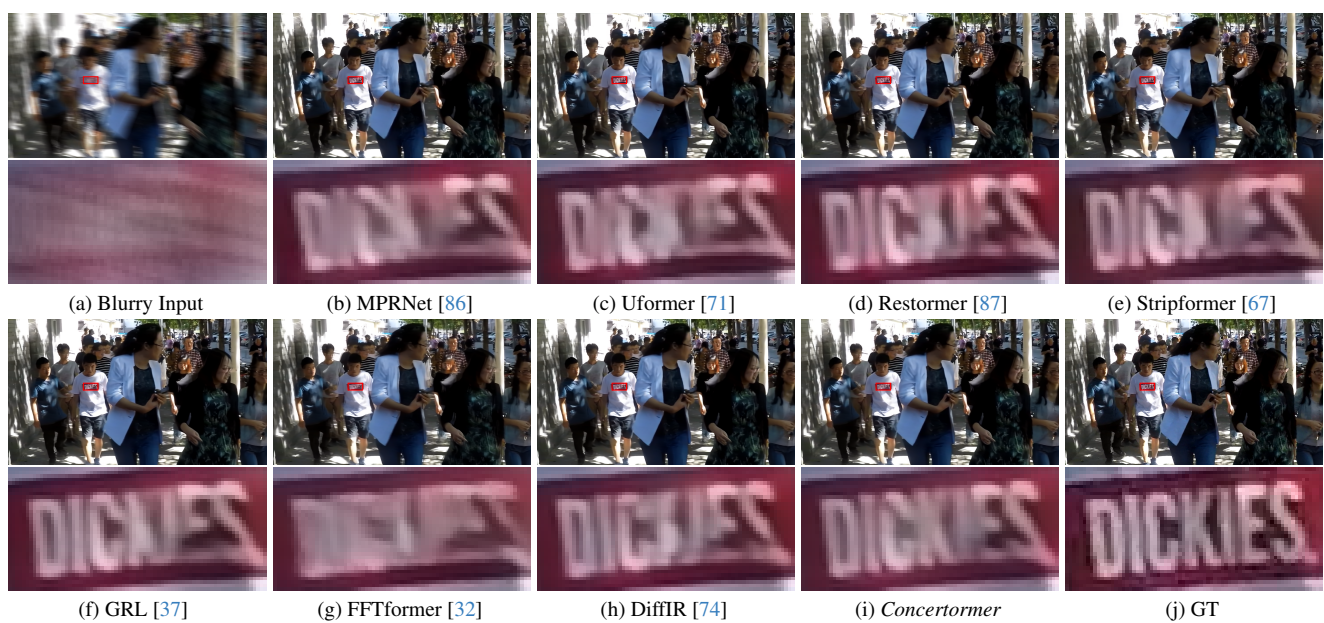

Figure 12. Visual comparisons of single-image motion deblurring on HIDE [61].

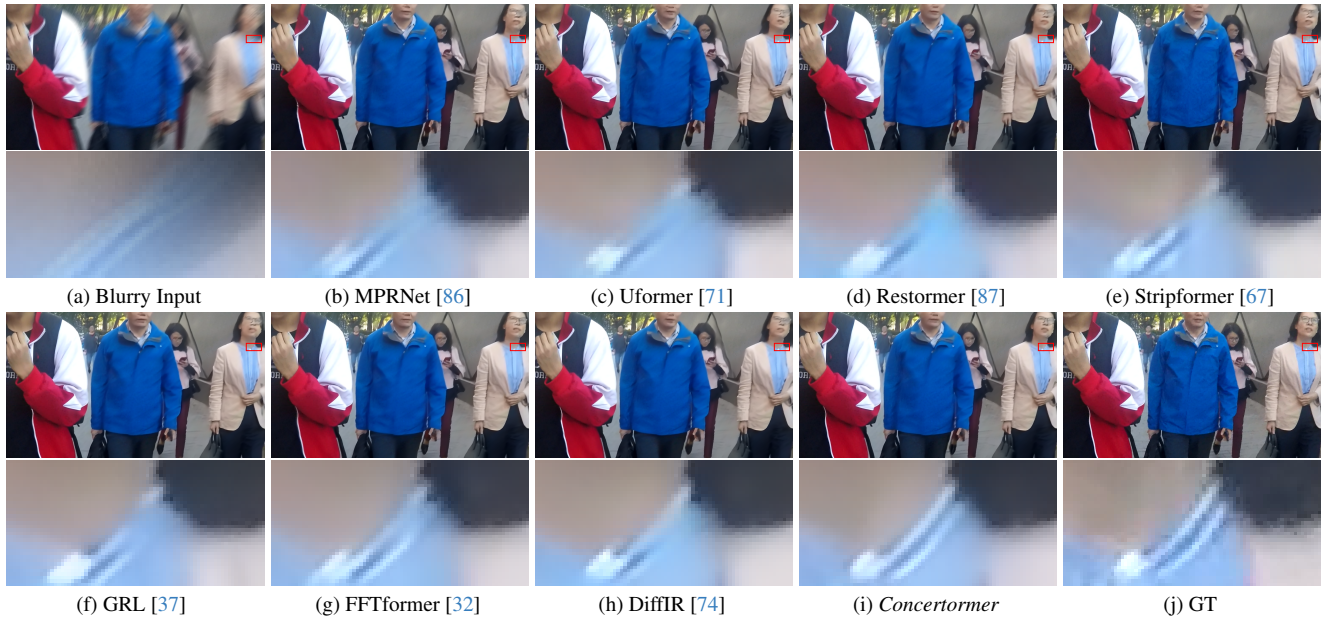

Figure 13. Visual comparisons of single-image motion deblurring on HIDE [61].

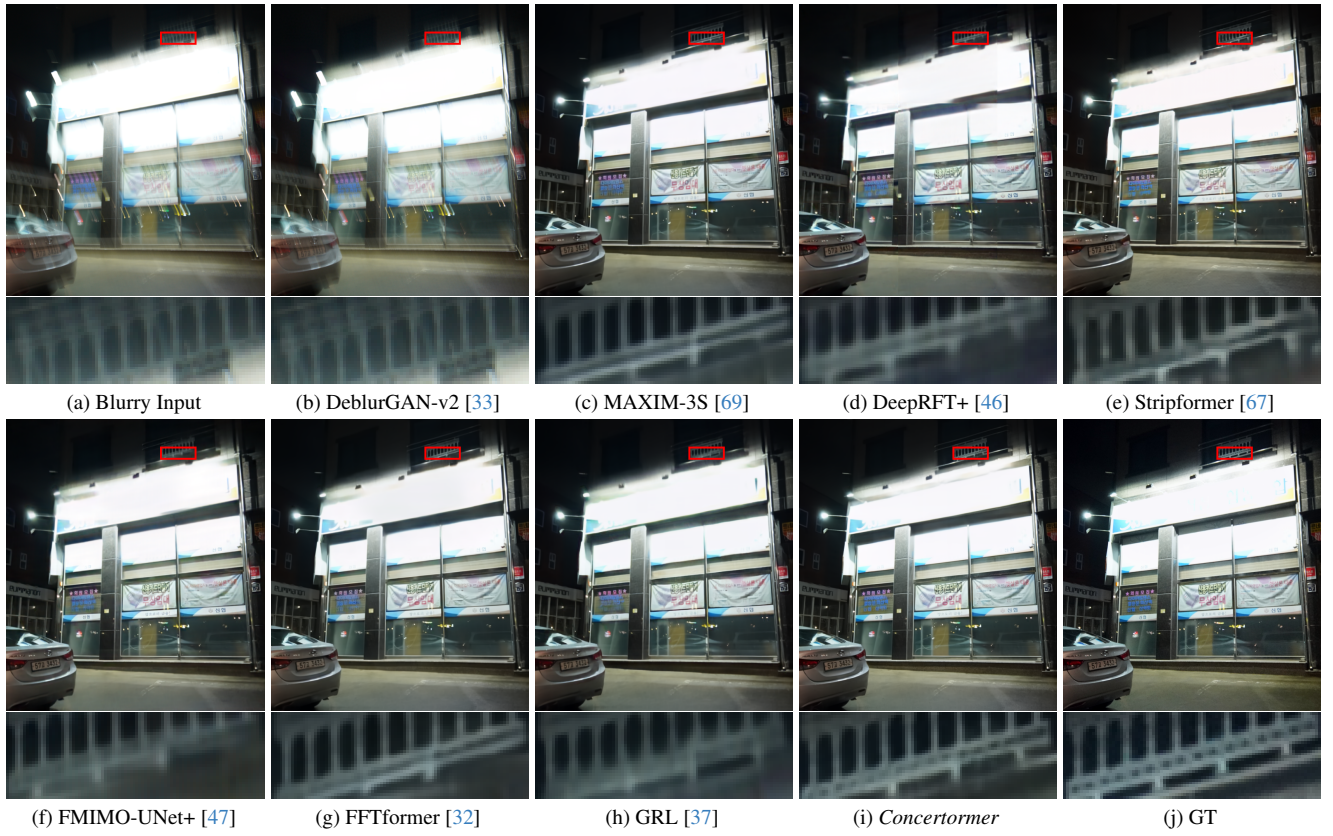

Figure 14. Visual comparisons of single-image motion deblurring on REALBLUR.J [58].



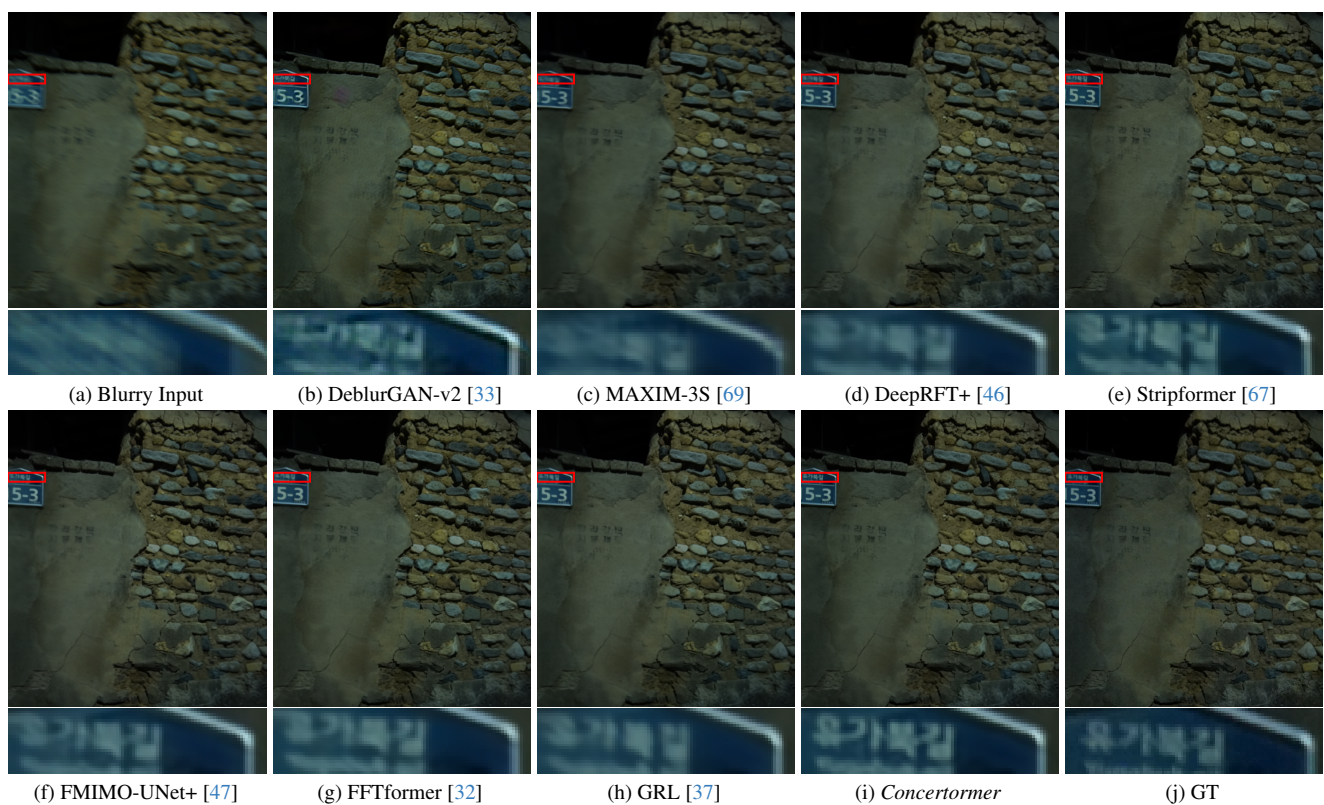

Figure 15. Visual comparisons of single-image motion deblurring on REALBLUR.J [58].

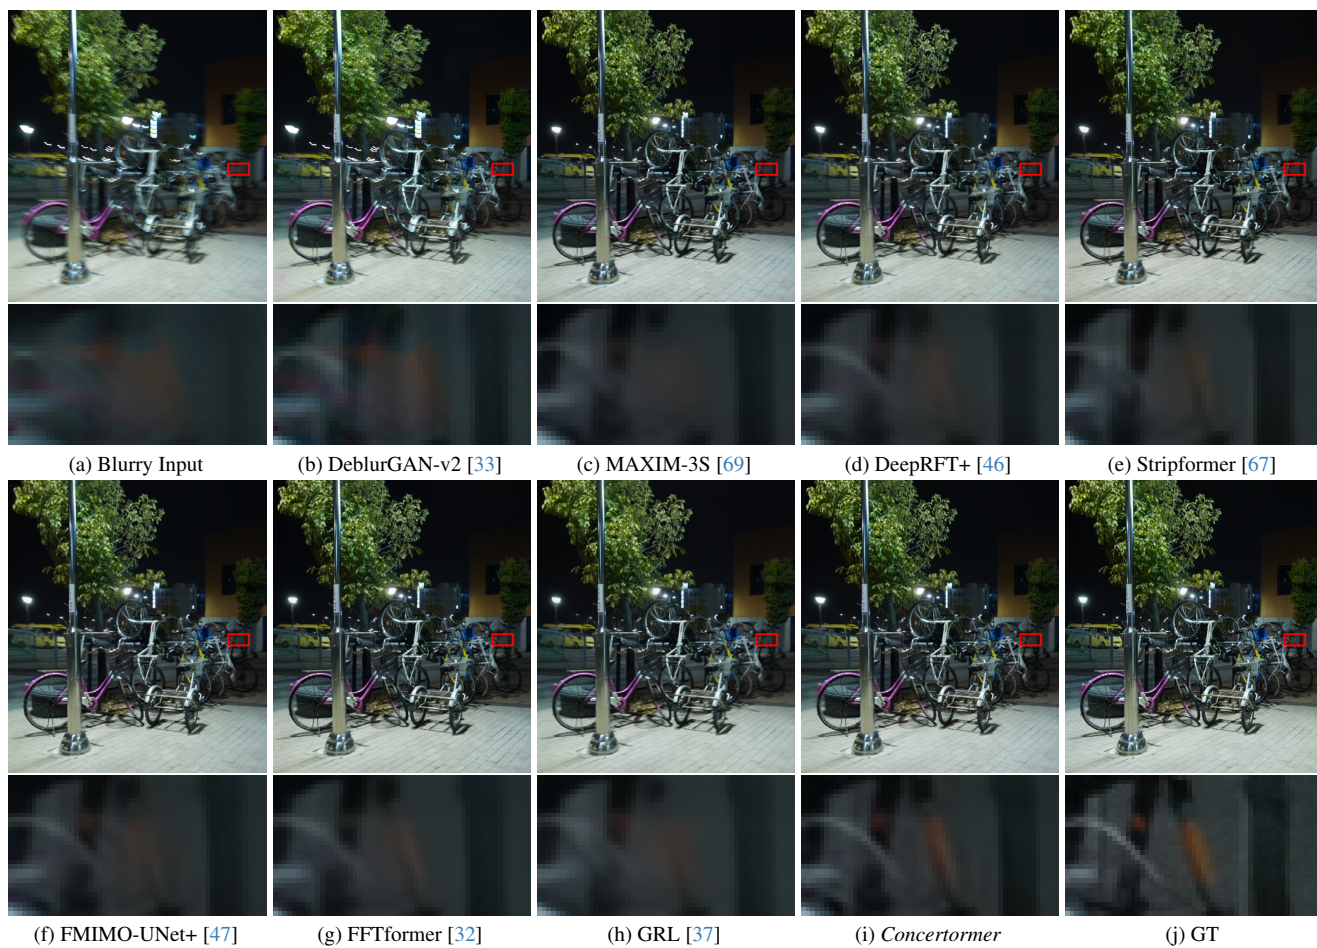

Figure 16. Visual comparisons of single-image motion deblurring on REALBLUR\_J [58].



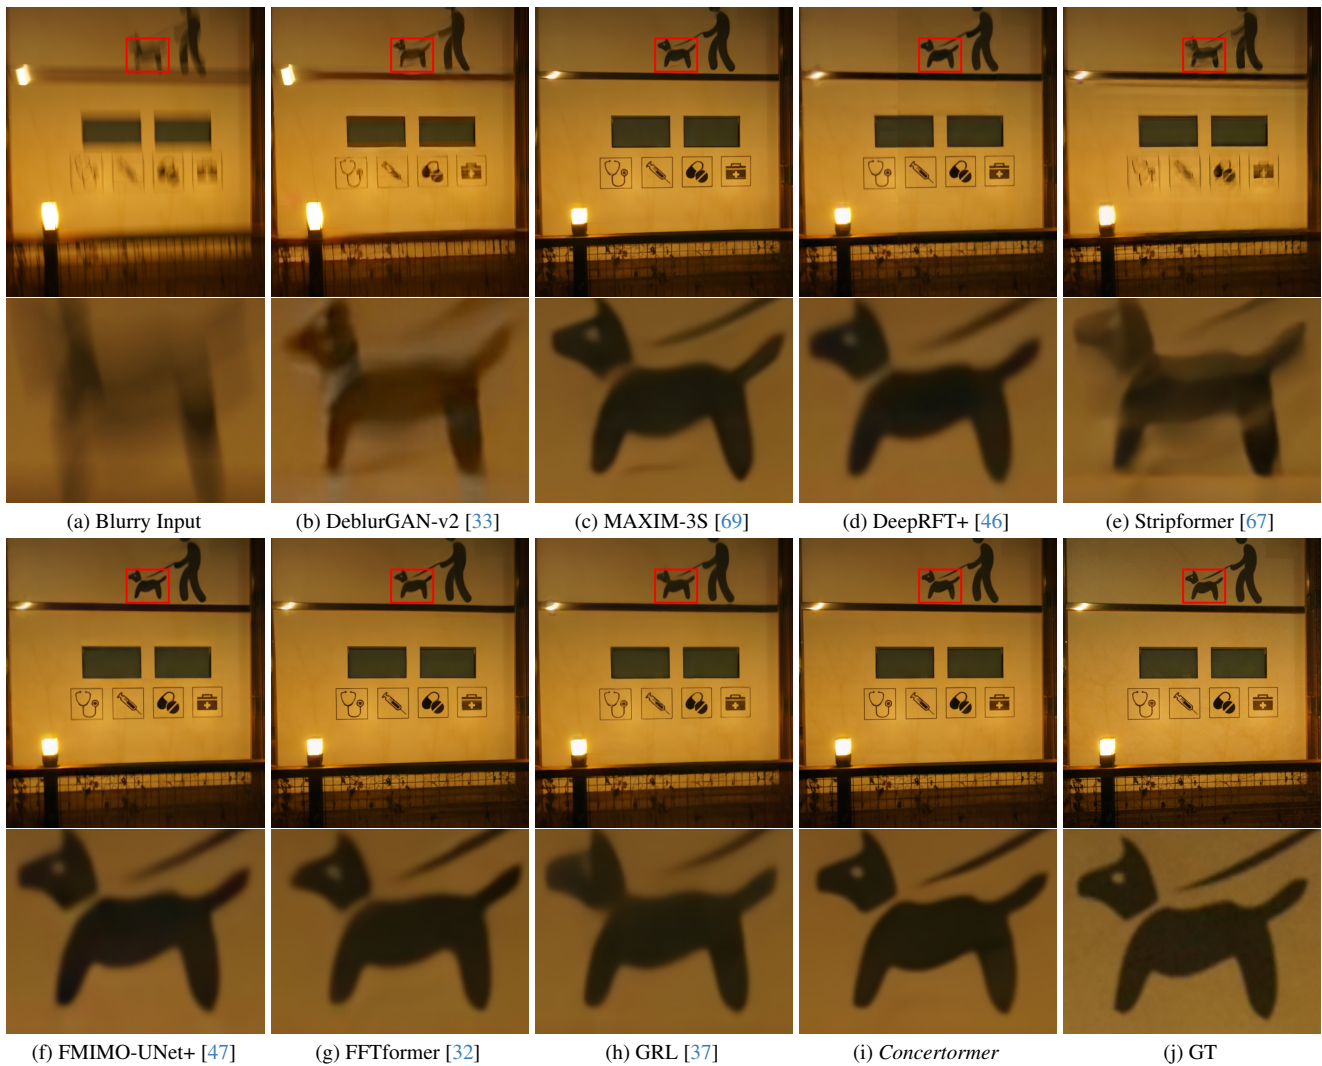

Figure 17. Visual comparisons of single-image motion deblurring on REALBLUR\_J [58].

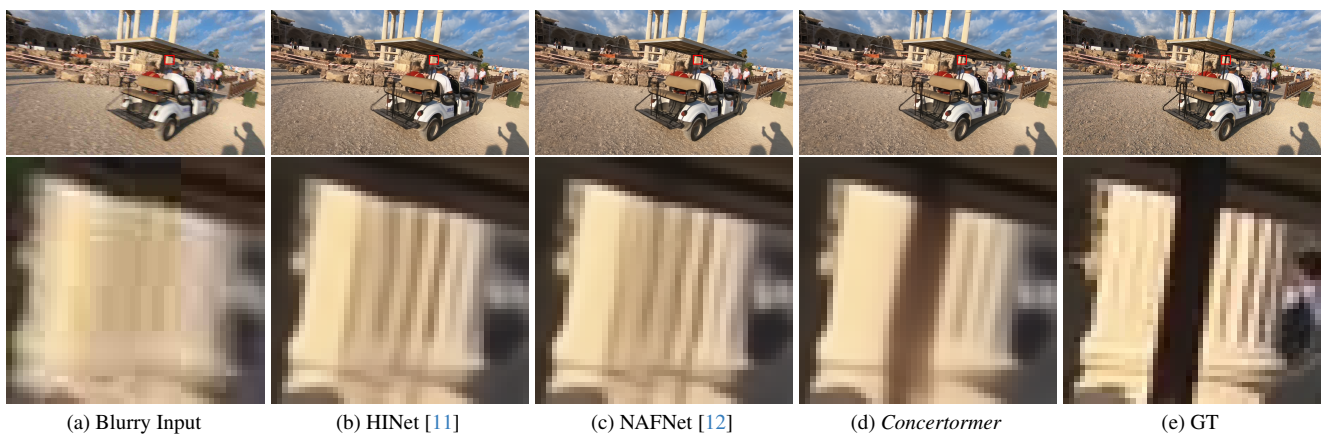

Figure 18. Visual comparisons of motion deblurring with JPEG artifacts on REDS-val-300 [51].

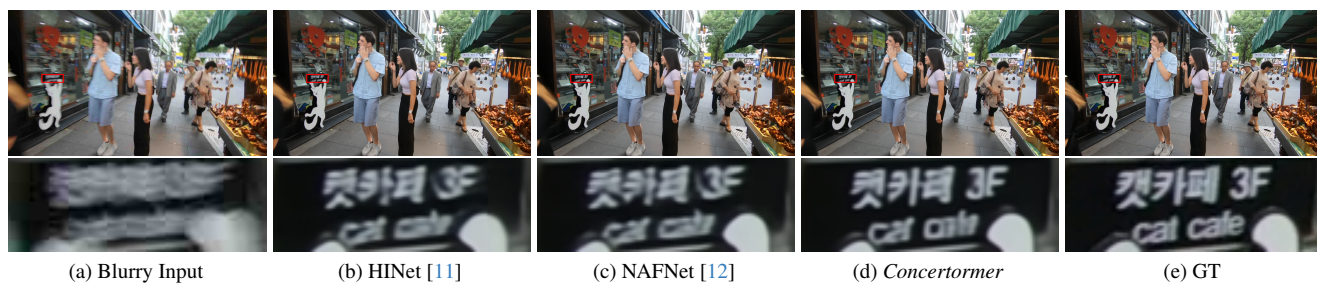

Figure 19. Visual comparisons of motion deblurring with JPEG artifacts on REDS-val-300 [51].

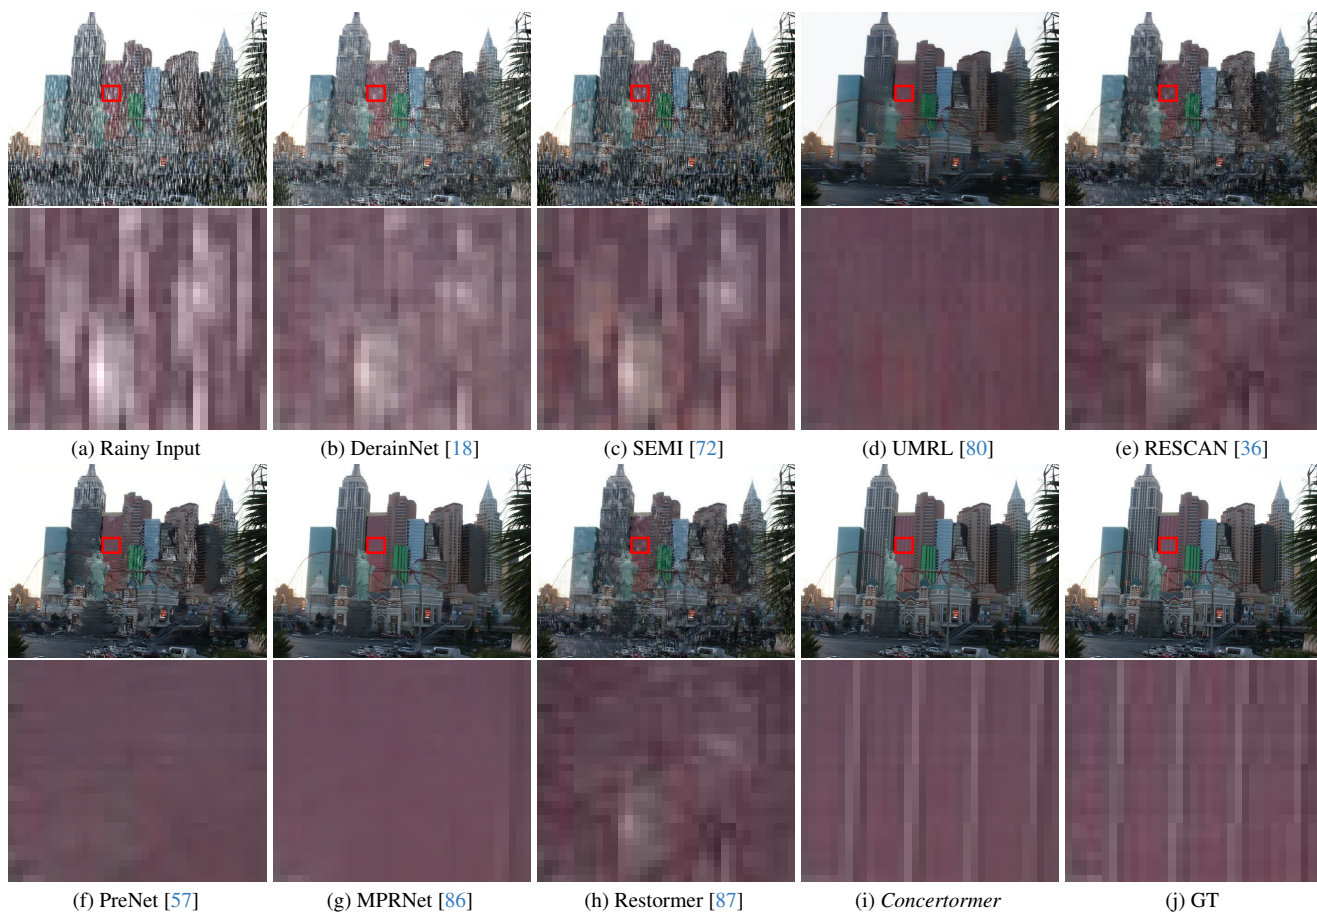

Figure 20. Visual comparisons of deraining on TEST100 [89].



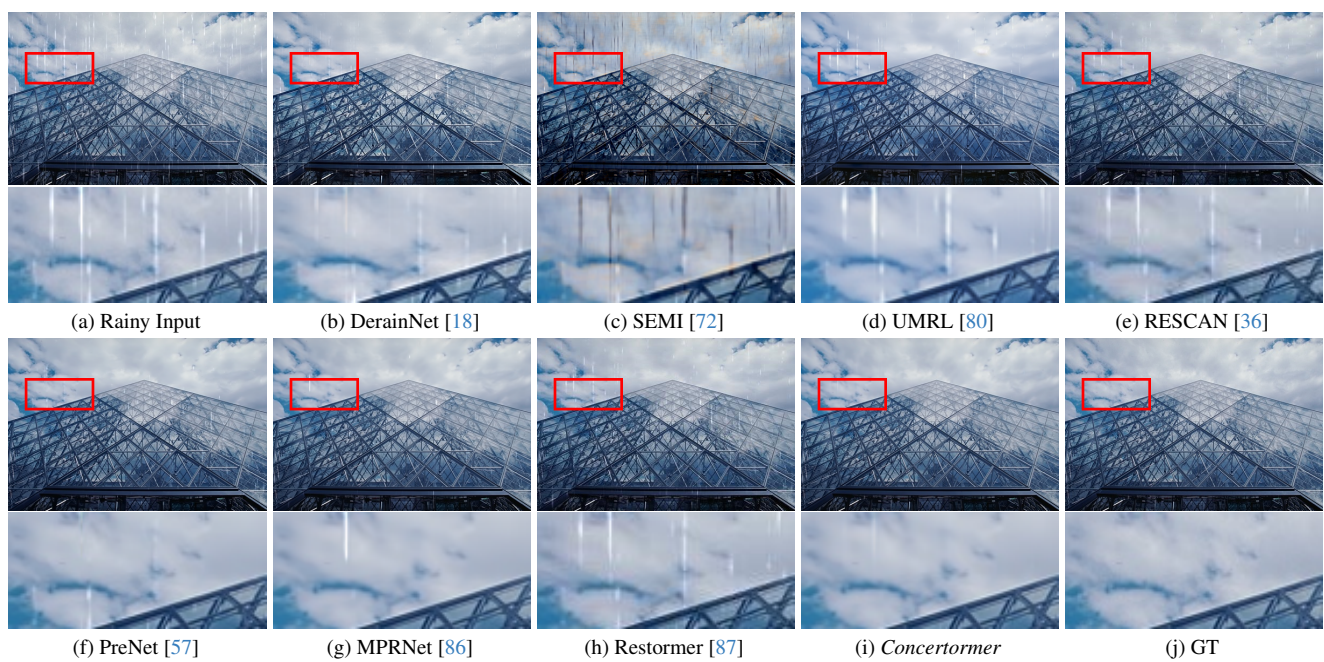

Figure 21. Visual comparisons of deraining on RAIN100L [79].
